# Supplementary material
Source: PubMed Central journal article supplement (PMC2629231)
Supplement: 0809272106_0809272106SI.pdf [file 0809272106_0809272106SI.pdf]

# Supporting Information

Purohit and Auerbach 10.1073/pnas.0809272106

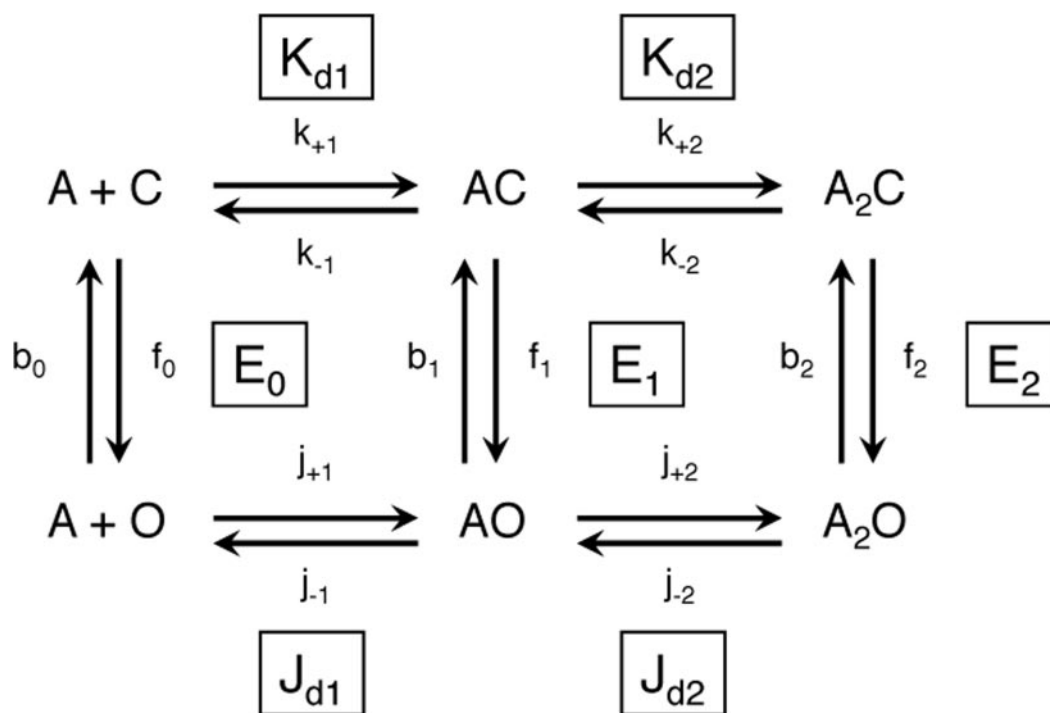

**Fig. S1.** State model for binding and gating. C is the stable, closed conformation (low-affinity for agonists and a nonconducting channel), and O is the stable open conformation (high-affinity and conducting). The arrows are the short-lived intermediates states that link the stable states. A is the agonist.  $k_+$  and  $j_+$  are the ligand association, and  $k_-$  and  $j_-$  are the ligand dissociation, rate constants in C vs. O.  $K_d$  and  $J_d$  are the corresponding equilibrium dissociation constants.  $f$  and  $b$  are the channel opening and closing rate constants; subscript is the number of bound ligands.  $E_0$ ,  $E_1$ , and  $E_2$  are the corresponding gating equilibrium constants ( $= f/b$ ). Estimates for all parameters are shown in Fig. 5.

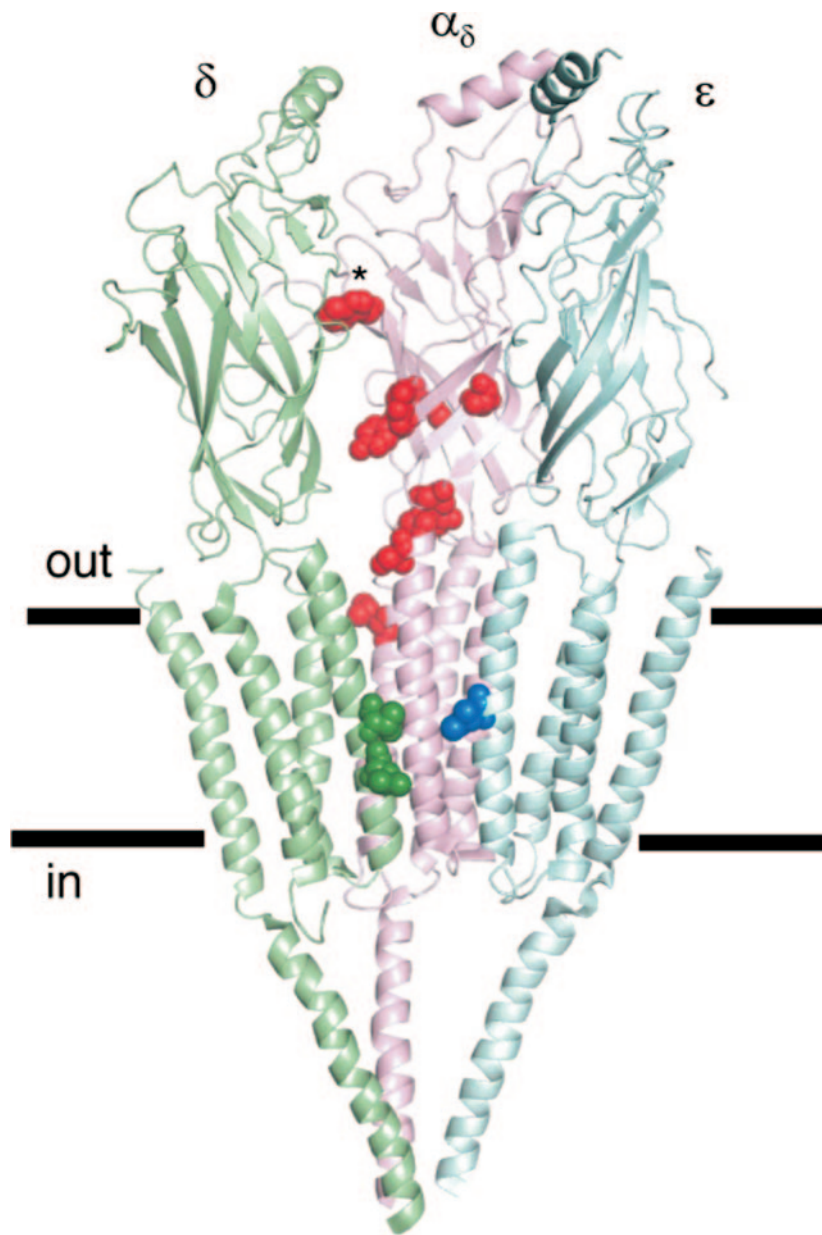

**Fig. S2.** Location of mutations. The  $\alpha\epsilon$  and  $\beta$  subunits have been removed, for clarity. The thick horizontal lines approximately mark the membrane. Subunits:  $\alpha_{\delta}$ , pink;  $\delta$ , green;  $\epsilon$ , blue. The mutated residues are shown as spheres (Table S1).  $\alpha$ W149 (asterisk) marks the transmitter binding site. The other mutated  $\alpha$  subunit residues are (*Top to Bottom*, approximately): D97 (loop A), Y127 ( $\beta 6'$  strand), M144 ( $\beta 7$  strand), E45 (loop 2), S52 ( $\beta 2$  strand), P272 (M2–M3 linker), S269 (M2; 27') and L279 (M3, 22'). The mutated transmembrane domain residues are: green, V269 ( $\delta$ M2, 13') and L265 ( $\delta$ M2, 9'); blue, V265 ( $\epsilon$ M2, 13'). The structural model is 2bg9.pdb.

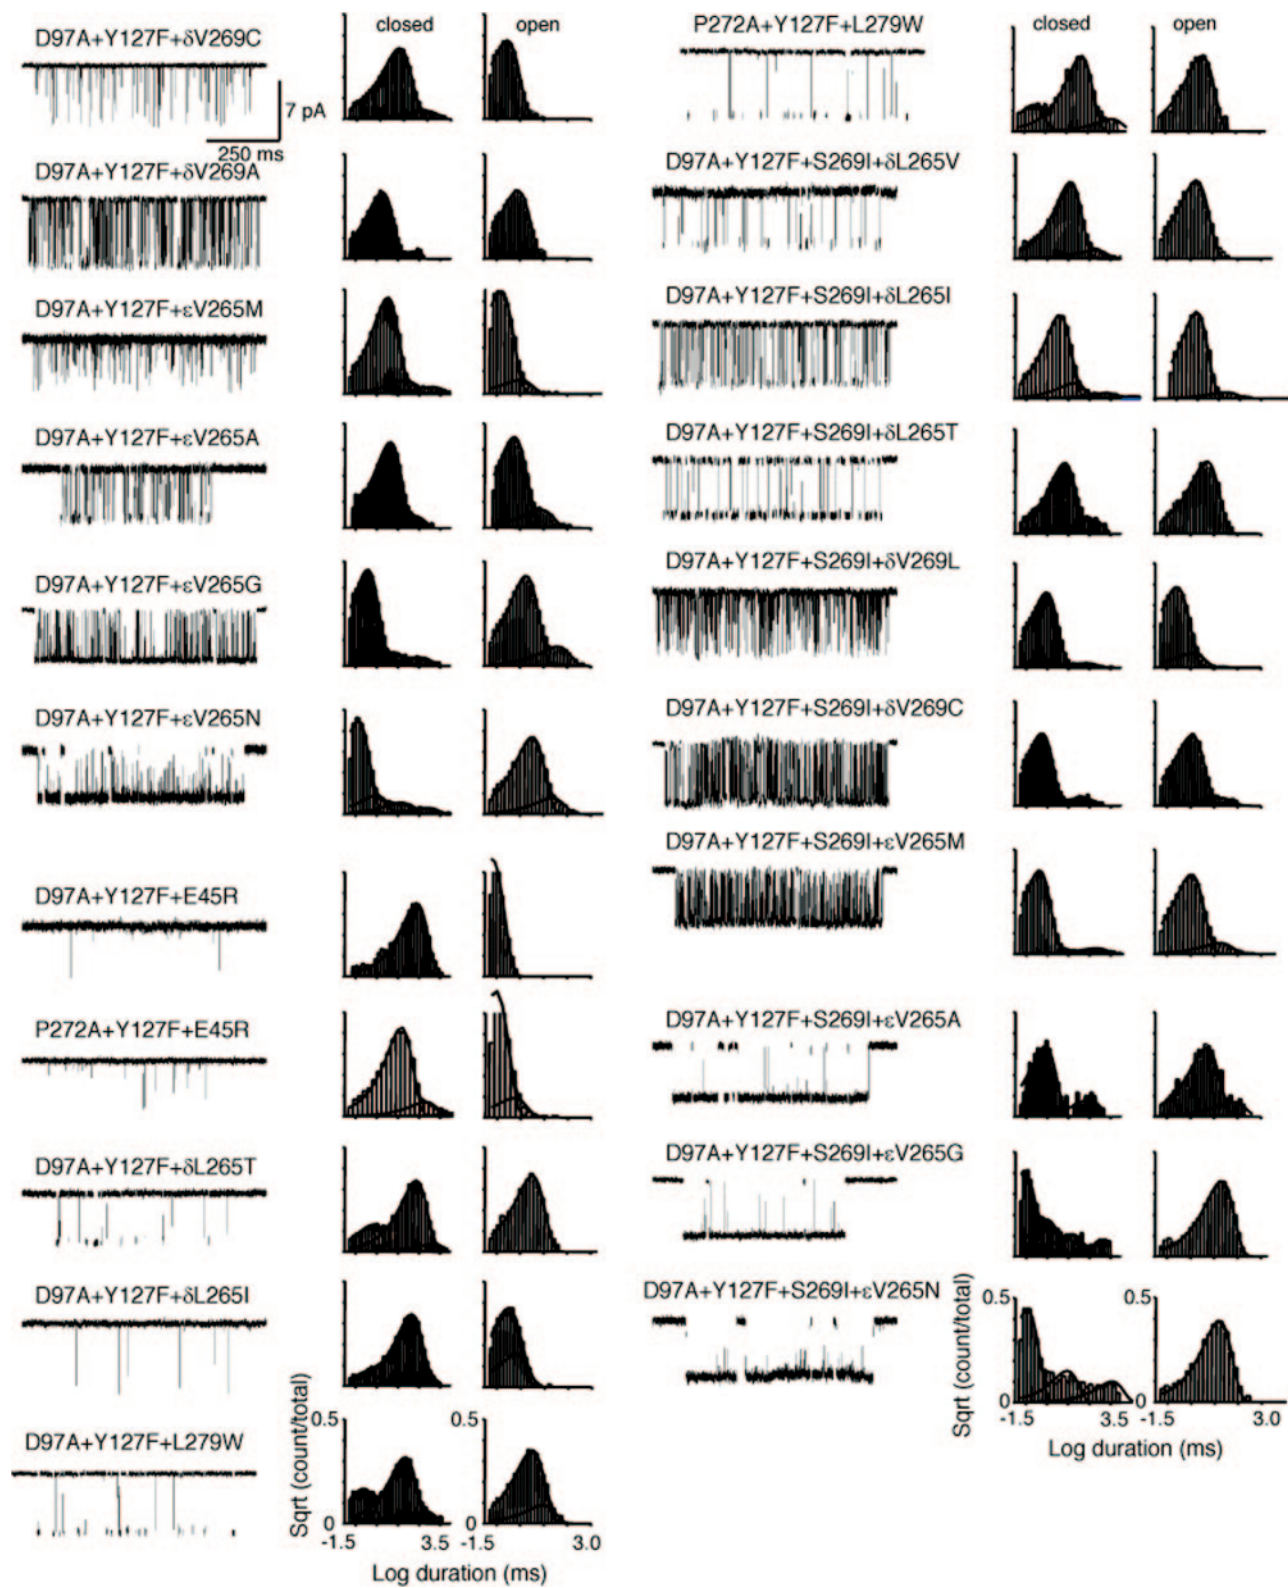

Fig. S3. Unliganded, single-channel currents and dwell-time histograms. Open is down. Unless noted otherwise, the mutations were in the  $\alpha$  subunit. See Fig. 2 for 4 additional constructs, and Table S2.

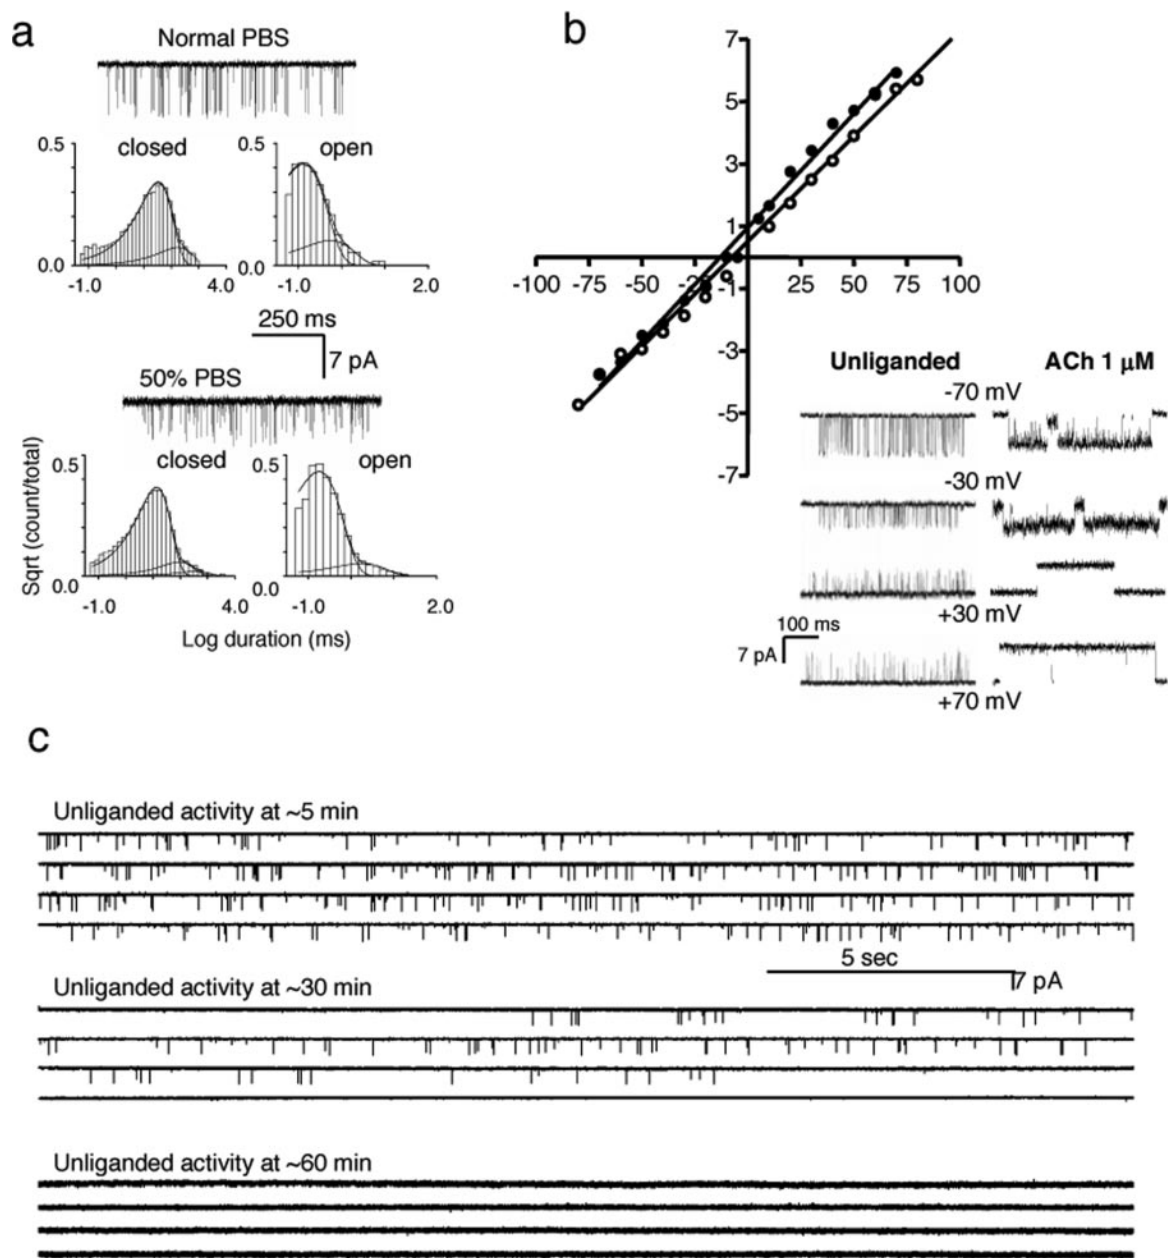

**Fig. S4.** Some features of unliganded gating. (a) Unliganded currents and interval duration histograms in different extracellular ionic strength solutions;  $\alpha$ (D97A+Y127F+S269I). The gating rate constants are similar in both solutions (Table S2). The current amplitude was 7 pA in normal PBS and 3.5 pA in 50% PBS. (b) I-V relationship for unliganded single-channel openings ( $\alpha$ D97A+ $\alpha$ Y127F+ $\delta$ V269T). The slope conductance is  $\approx$ 67 pS, comparable with that for diliganded AChRs (72 pS). (c)  $\alpha$ -Bungarotoxin blocks unliganded gating ( $\alpha$ (Y127F+P272A)). The cell-attached pipette was backfilled with 100 nM toxin, which diffused the tip to gradually inhibit spontaneous openings.

**Table S1. Location and effect of mutations on  $E_2$  in AChRs**

| Mutant         | Location   |                     | Fold-change in $E_2$ | Ref.                                 |
|----------------|------------|---------------------|----------------------|--------------------------------------|
|                | Subunit    | Secondary structure |                      |                                      |
| D97A           | $\alpha$   | Loop A              | 168                  | (1)                                  |
| Y127F          | $\alpha$   | $\beta 6'$ strand   | 59                   | (2)                                  |
| E45R           | $\alpha$   | Loop 2              | 16.5                 | (3)                                  |
| $\alpha$ S269I | $\alpha$   | M2–M3 linker        | 115                  | (4)                                  |
| P272A          | $\alpha$   | M2–M3 linker        | 218                  | (5)                                  |
| L279W          | $\alpha$   | M3                  | 156                  | (6)                                  |
| S52F           | $\alpha$   | $\beta 2$ strand    | 3                    | Unpublished data                     |
| M144L          | $\alpha$   | $\beta 7$ strand    | 6.5                  | (7)                                  |
| L265V          | $\delta$   | M2                  | 0.89                 | (8)                                  |
| L265I          | $\delta$   | M2                  | 5                    | (8)                                  |
| L265T          | $\delta$   | M2                  | 9                    | (8)                                  |
| V269L          | $\delta$   | M2                  | 14                   | (8)                                  |
| V269C          | $\delta$   | M2                  | 69                   | (8)                                  |
| V269A          | $\delta$   | M2                  | 250                  | (8)                                  |
| V269T          | $\delta$   | M2                  | 295                  | (8)                                  |
| V265M          | $\epsilon$ | M2                  | 30                   | Jha <i>et al.</i> , unpublished data |
| V265A          | $\epsilon$ | M2                  | 245                  | Jha <i>et al.</i> , unpublished data |
| V265G          | $\epsilon$ | M2                  | 3,098                | Jha <i>et al.</i> , unpublished data |
| V265N          | $\epsilon$ | M2                  | 15,520               | Jha <i>et al.</i> , unpublished data |

The fold-change in  $E_2$  is from experimental rate constant measurements  $[(f_2/b_2)^{mut}/(f_2/b_2)^{WT}]$ . See Fig. S2 for location in the unliganded-closed *Torpedo* AChR. Loop A is part of the TBS;  $\alpha$ D97A does not alter  $K_d$  (1).

1. Chakrapani S, Bailey TD, Auerbach A (2003) The role of loop 5 in acetylcholine receptor channel gating. *J Gen Physiol* 122:521–539.
2. Purohit P, Auerbach A (2007) Acetylcholine receptor gating: Movement in the  $\alpha$  subunit extracellular domain. *J Gen Physiol* 130:569–579.
3. Purohit P, Auerbach A (2007) Acetylcholine receptor gating at extracellular transmembrane domain interface: The "Pre-M1" linker. *J Gen Physiol* 130:559–568.
4. Mitra A, Cymes GD, Auerbach A (2005) Dynamics of the acetylcholine receptor pore at the gating transition state. *Proc Natl Acad Sci USA* 102:15069–15074.
5. Jha A, Cadugan DJ, Purohit P, Auerbach A (2007) Acetylcholine receptor gating at extracellular transmembrane domain interface: The Cys-loop and M2–M3 linker. *J Gen Physiol* 130:547–558.
6. Cadugan DJ, Auerbach A (2007) Conformational dynamics of the  $\alpha$  M3 transmembrane helix during acetylcholine receptor channel gating. *Biophys J* 93:859–865.
7. Chakrapani S, Bailey TD, Auerbach A (2004) Gating dynamics of the acetylcholine receptor extracellular domain. *J Gen Physiol* 123:341–356.
8. Cymes GD, Grosman C, Auerbach A (2002) Structure of the transition state of gating in the acetylcholinereceptor channel pore: A  $\Phi$  value analysis. *Biochemistry* 41:5548–5555.

**Table S2. Effects of mutation combinations on  $E_0$** 

| Construct                               | $E_2$ fold-increase  | $f_0, s^{-1}$     | $b_0, s^{-1}$      | $E_0^{\text{construct}}$ | $E_0^{\text{WT}}$    | $n$ |
|-----------------------------------------|----------------------|-------------------|--------------------|--------------------------|----------------------|-----|
| D97A + Y127F + S52F                     | $2.9 \times 10^4$    | $45 \pm 7$        | $6,290 \pm 1,464$  | $0.007 \pm 0.001$        | $2.4 \times 10^{-7}$ | 5   |
| D97A + Y127F + S269I                    | $1.1 \times 10^6$    | $187 \pm 48$      | $3,994 \pm 1,106$  | $0.048 \pm 0.008$        | $4.2 \times 10^{-8}$ | 8   |
| D97A + Y127F + S269I*                   | —                    | $144 \pm 30$      | $5,898 \pm 774$    | $0.025 \pm 0.008$        | —                    | 2   |
| D97A + Y127F + P272A                    | $2.2 \times 10^6$    | $838 \pm 243$     | $3,288 \pm 89$     | $0.25 \pm 0.08$          | $1.2 \times 10^{-7}$ | 3   |
| D97A + Y127F + P272A + M144L            | $1.4 \times 10^7$    | $3,100 \pm 91$    | $2,457 \pm 914$    | $1.36 \pm 0.54$          | $9.7 \times 10^{-8}$ | 2   |
| D97A + Y127F + S269I + $\epsilon$ V265M | $3.4 \times 10^7$    | $2,765 \pm 635$   | $1,804 \pm 661$    | $1.77 \pm 0.85$          | $5.2 \times 10^{-8}$ | 4   |
| D97A + Y127F + S269I + $\epsilon$ V265A | $2.8 \times 10^8$    | $1,501 \pm 91$    | $195 \pm 48$       | $8.0 \pm 2.4$            | $2.9 \times 10^{-8}$ | 2   |
| D97A + Y127F + S269I + $\epsilon$ V265G | $3.5 \times 10^9$    | $9,921 \pm 1,210$ | $91.7 \pm 9$       | $108 \pm 5.4$            | $3.1 \times 10^{-8}$ | 3   |
| D97A + Y127F + S269I + $\epsilon$ V265N | $1.7 \times 10^{10}$ | $16,690 \pm 357$  | $44.3 \pm 7$       | $387 \pm 124$            | $2.2 \times 10^{-7}$ | 3   |
| D97A + Y127F + $\epsilon$ V265M         | $2.9 \times 10^5$    | $483 \pm 55$      | $8,584 \pm 674$    | $0.057 \pm 0.01$         | $1.9 \times 10^{-7}$ | 3   |
| D97A + Y127F + $\epsilon$ V265A         | $2.4 \times 10^6$    | $300 \pm 11$      | $1,343 \pm 221$    | $0.23 \pm 0.04$          | $9.5 \times 10^{-8}$ | 3   |
| D97A + Y127F + $\epsilon$ V265G         | $3.0 \times 10^7$    | $4,512 \pm 870$   | $848 \pm 185$      | $5.34 \pm 0.21$          | $1.7 \times 10^{-7}$ | 3   |
| D97A + Y127F + $\epsilon$ V265N         | $1.5 \times 10^8$    | $9,637 \pm 730$   | $656 \pm 196$      | $15.2 \pm 3.4$           | $9.9 \times 10^{-8}$ | 2   |
| D97A + Y127F + S269I + $\delta$ V269L   | $1.6 \times 10^7$    | $1,560 \pm 5$     | $4,467 \pm 265$    | $0.35 \pm 0.02$          | $2.2 \times 10^{-8}$ | 3   |
| D97A + Y127F + S269I + $\delta$ V269C   | $7.8 \times 10^7$    | $2,010 \pm 318$   | $1,255 \pm 212$    | $1.65 \pm 0.5$           | $2.1 \times 10^{-8}$ | 3   |
| D97A + Y127F + $\delta$ V269C           | $6.8 \times 10^5$    | $231 \pm 23$      | $4,095 \pm 214$    | $0.056 \pm 0.004$        | $8.2 \times 10^{-8}$ | 3   |
| D97A + Y127F + $\delta$ V269A           | $2.4 \times 10^6$    | $600 \pm 71$      | $1,500 \pm 37$     | $0.4 \pm 0.06$           | $1.6 \times 10^{-7}$ | 2   |
| D97A + Y127F + S269I + $\delta$ L265V   | $1.0 \times 10^6$    | $84.3 \pm 20$     | $921 \pm 225$      | $0.1 \pm 0.04$           | $9.9 \times 10^{-8}$ | 3   |
| D97A + Y127F + S269I + $\delta$ L265I   | $5.6 \times 10^6$    | $347 \pm 124$     | $1,275 \pm 54$     | $0.27 \pm 0.1$           | $4.7 \times 10^{-8}$ | 3   |
| D97A + Y127F + S269I + $\delta$ L265T   | $1.0 \times 10^7$    | $188 \pm 23$      | $169 \pm 78$       | $1.28 \pm 0.7$           | $1.2 \times 10^{-7}$ | 2   |
| D97A + Y127F + $\delta$ L265I           | $4.9 \times 10^4$    | 31                | 3,488              | 0.0088                   | $1.8 \times 10^{-7}$ | 1   |
| D97A + Y127F + $\delta$ L265T           | $8.9 \times 10^4$    | 20                | 314                | 0.064                    | $7.2 \times 10^{-7}$ | 1   |
| D97A + Y127F + E45R                     | $1.6 \times 10^5$    | $39 \pm 1$        | $13,650 \pm 4,664$ | $0.003 \pm 0.001$        | $1.8 \times 10^{-8}$ | 3   |
| P272A + Y127F + E45R                    | $2.1 \times 10^5$    | $171 \pm 2$       | $12,810 \pm 1,637$ | $0.013 \pm 0.001$        | $6.1 \times 10^{-8}$ | 2   |
| D97A + Y127F + L279W                    | $1.5 \times 10^6$    | $59 \pm 7$        | $300 \pm 20$       | $0.19 \pm 0.01$          | $1.2 \times 10^{-7}$ | 2   |
| P272A + Y127F + L279W                   | $2.0 \times 10^6$    | 25                | 318                | 0.078                    | $3.9 \times 10^{-8}$ | 1   |

The  $E_2$  fold-increase is the product of the fold-increases in  $E_2$  for each mutation (whole AChR).  $f_0$  and  $b_0$  are the unliganded opening and closing rate constants.  $E_0^{\text{construct}} = f_0/b_0$ .  $E_0^{\text{WT}} = E_0^{\text{construct}}/E_2$  fold-increase;  $n$  is number of patches.

\*Measured in 50% PBS. See Fig S3.
